# Supplementary material
Source: PubMed Central journal article supplement (PMC6812656)
Supplement: NIHMS1053837-supplement-SI.pdf [file NIHMS1053837-supplement-SI.pdf]

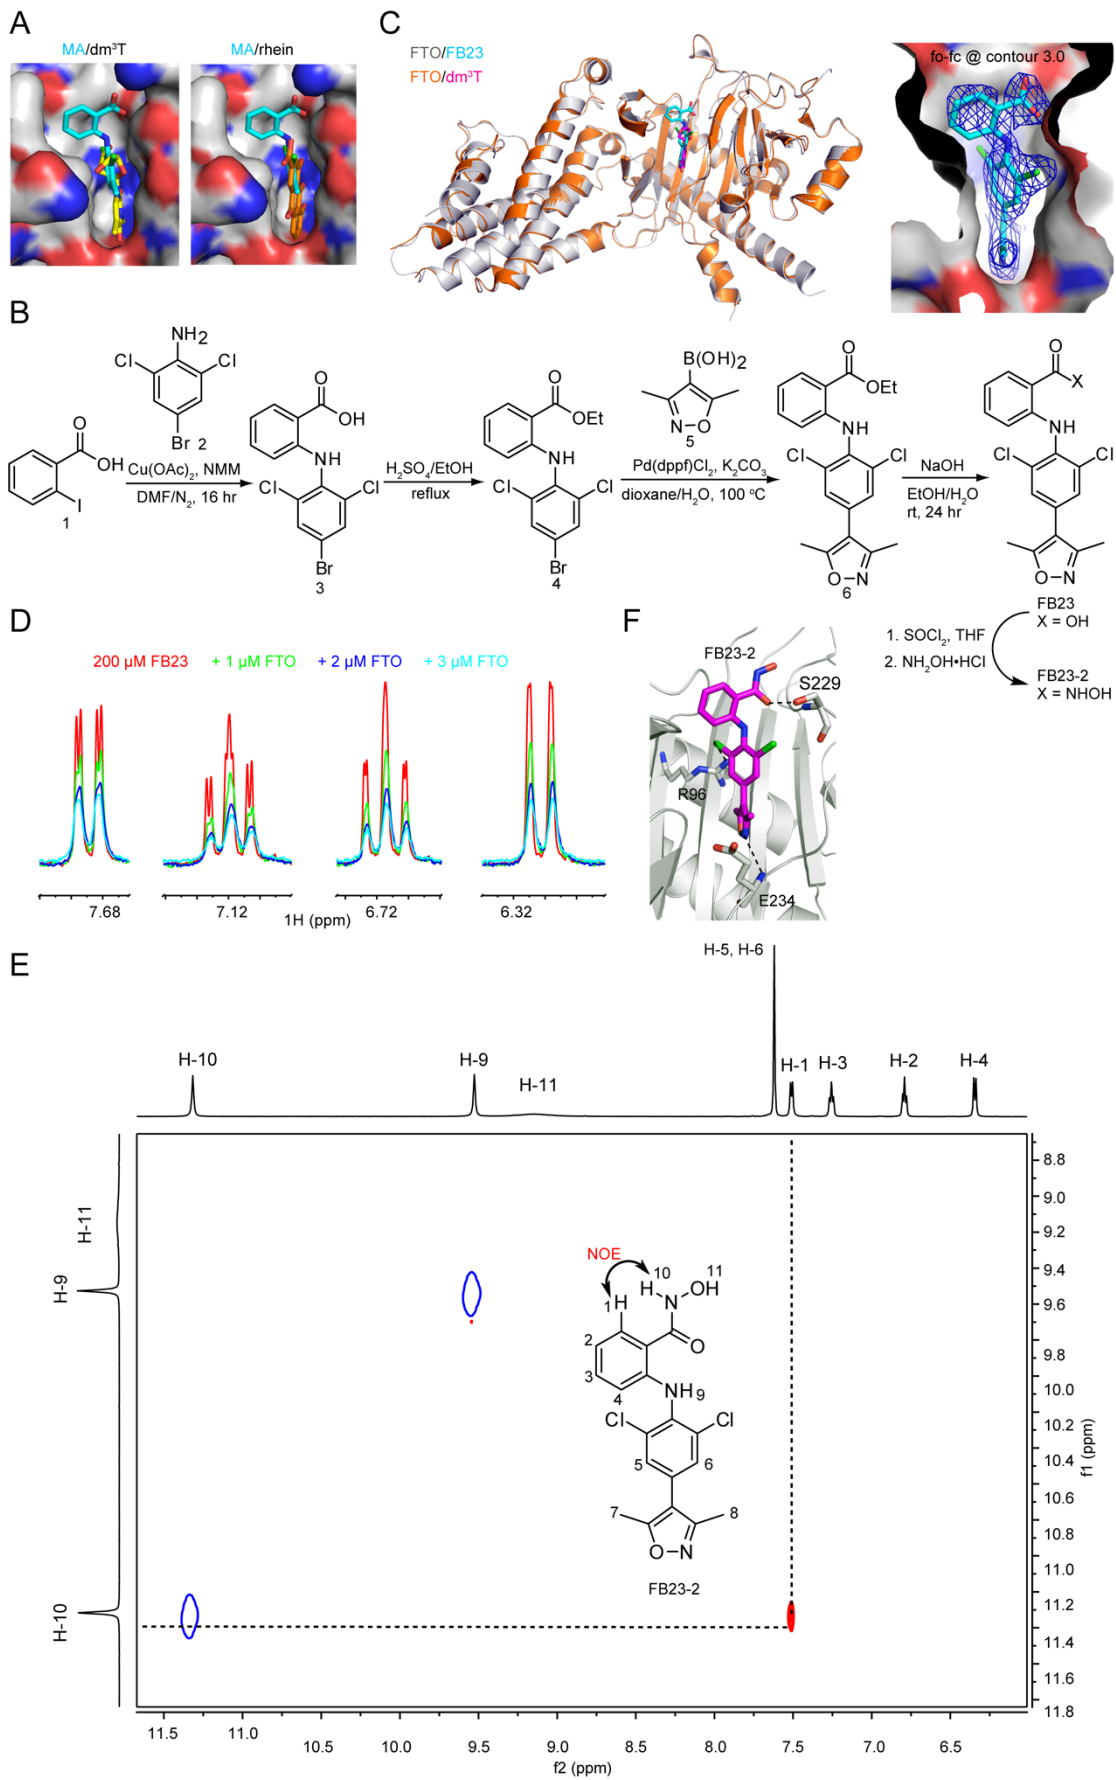

**Figure S1. Development of FTO inhibitor FB23 and FB23-2, Related to Figure 1.** (A) Structural complexes of FTO bound with different ligands. MA from FTO/MA complex (PDB code 4QKN) is colored in cyan, dm<sup>3</sup>T from FTO/dm<sup>3</sup>T complex (PDB code 3LFM) in yellow, and rhein from FTO/rhein complex (PDB code 4IE7) in orange, respectively. The structural superimpositions indicate a strategy to design a more potent inhibitor based on MA scaffold. (B) Synthetic scheme of compound FB23 and FB23-2. (C) Crystal structure of FTO bound with FB23. The overall structural complex of FTO/FB23 was colored in grey, and FB23 was colored in cyan. FTO protein in the structural complex of FTO/dm<sup>3</sup>T was colored in orange, and dm<sup>3</sup>T in magenta. The structural superimposition was performed in PyMol. The simulated annealing Fo-Fc density map contoured to 3.0 sigma was showed in blue color to confirm that FB23 is indeed bound. (D) NMR measurement of direct interaction between FB23 and FTO protein. NMR-CPMG spectra were recorded for FB23 at 200 μM (red), and in the presence of FTO at 1.0 μM (green), 2.0 μM (blue), and 3.0 μM (cyan), respectively. (E) <sup>1</sup>H nuclear Overhauser effect spectroscopy (NOESY) for FB23-2. The relative configuration of the benzohydroxamic acid in FB23-2 was interfered from the NOE correlation between H-1 and H-10 in the NOESY spectrum, which reveals a hydrogen-bond between H-9 and the carbonyl. (F) Molecular docking of FB23-2 into the structural complex of FTO/FB23. This was performed in PyMOL according to the absolute configuration of FB23-2 determined by both X-ray (see Figure 1H) and NOESY experiment.

**Table S1. Data collection and refinement statistics<sup>a</sup>, Related to Figure 1.**

| FTO/FB23 (6AKW)                                     |                                    |
|-----------------------------------------------------|------------------------------------|
| <b>Data collection</b>                              |                                    |
| Space group                                         | H 3                                |
| Cell dimensions                                     |                                    |
| <i>a</i> , <i>b</i> , <i>c</i> (Å)                  | 141.39, 141.39, 83.61              |
| $\alpha$ , $\beta$ , $\gamma$ (°)                   | 90, 90, 120                        |
| Resolution (Å)                                      | 30.0-2.20 (2.28-2.20) <sup>b</sup> |
| No. of observations                                 | 224472                             |
| No. unique                                          | 31725 (3187)                       |
| <i>R</i> <sub>sym</sub> <sup>c</sup>                | 0.067 (0.804)                      |
| <i>I</i> / $\sigma$ ( <i>I</i> )                    | 27.3 (1.83)                        |
| Completeness (%)                                    | 100 (99.8)                         |
| Redundancy                                          | 7.1 (5.8)                          |
| <b>Data refinement</b>                              |                                    |
| Resolution (Å)                                      | 28.74-2.20                         |
| No. reflections                                     | 27969                              |
| Completeness (%)                                    | 88.2                               |
| <i>R</i> <sub>work</sub> / <i>R</i> <sub>free</sub> | 0.212/0.254                        |
| No. atoms                                           |                                    |
| protein                                             | 3476                               |
| ligand                                              | 35                                 |
| water                                               | 153                                |
| Wilson B factors (Å <sup>2</sup> )                  | 29.2                               |
| Rmsd <sup>d</sup> in                                |                                    |
| Bond lengths (Å)                                    | 0.002                              |
| Bond angles (°)                                     | 0.651                              |
| Ramachandran Plot                                   |                                    |
| Favored (%)                                         | 98.6                               |
| Allowed (%)                                         | 1.4                                |

<sup>a</sup>The structure was solved using one crystal.

<sup>b</sup>Highest resolution shell is shown in parenthesis.

<sup>c</sup> $R_{\text{sym}} = \sum(|I - \langle I \rangle|) / \sum(I)$ , where *I* is the observed intensity.

<sup>d</sup>Root mean squared deviation.

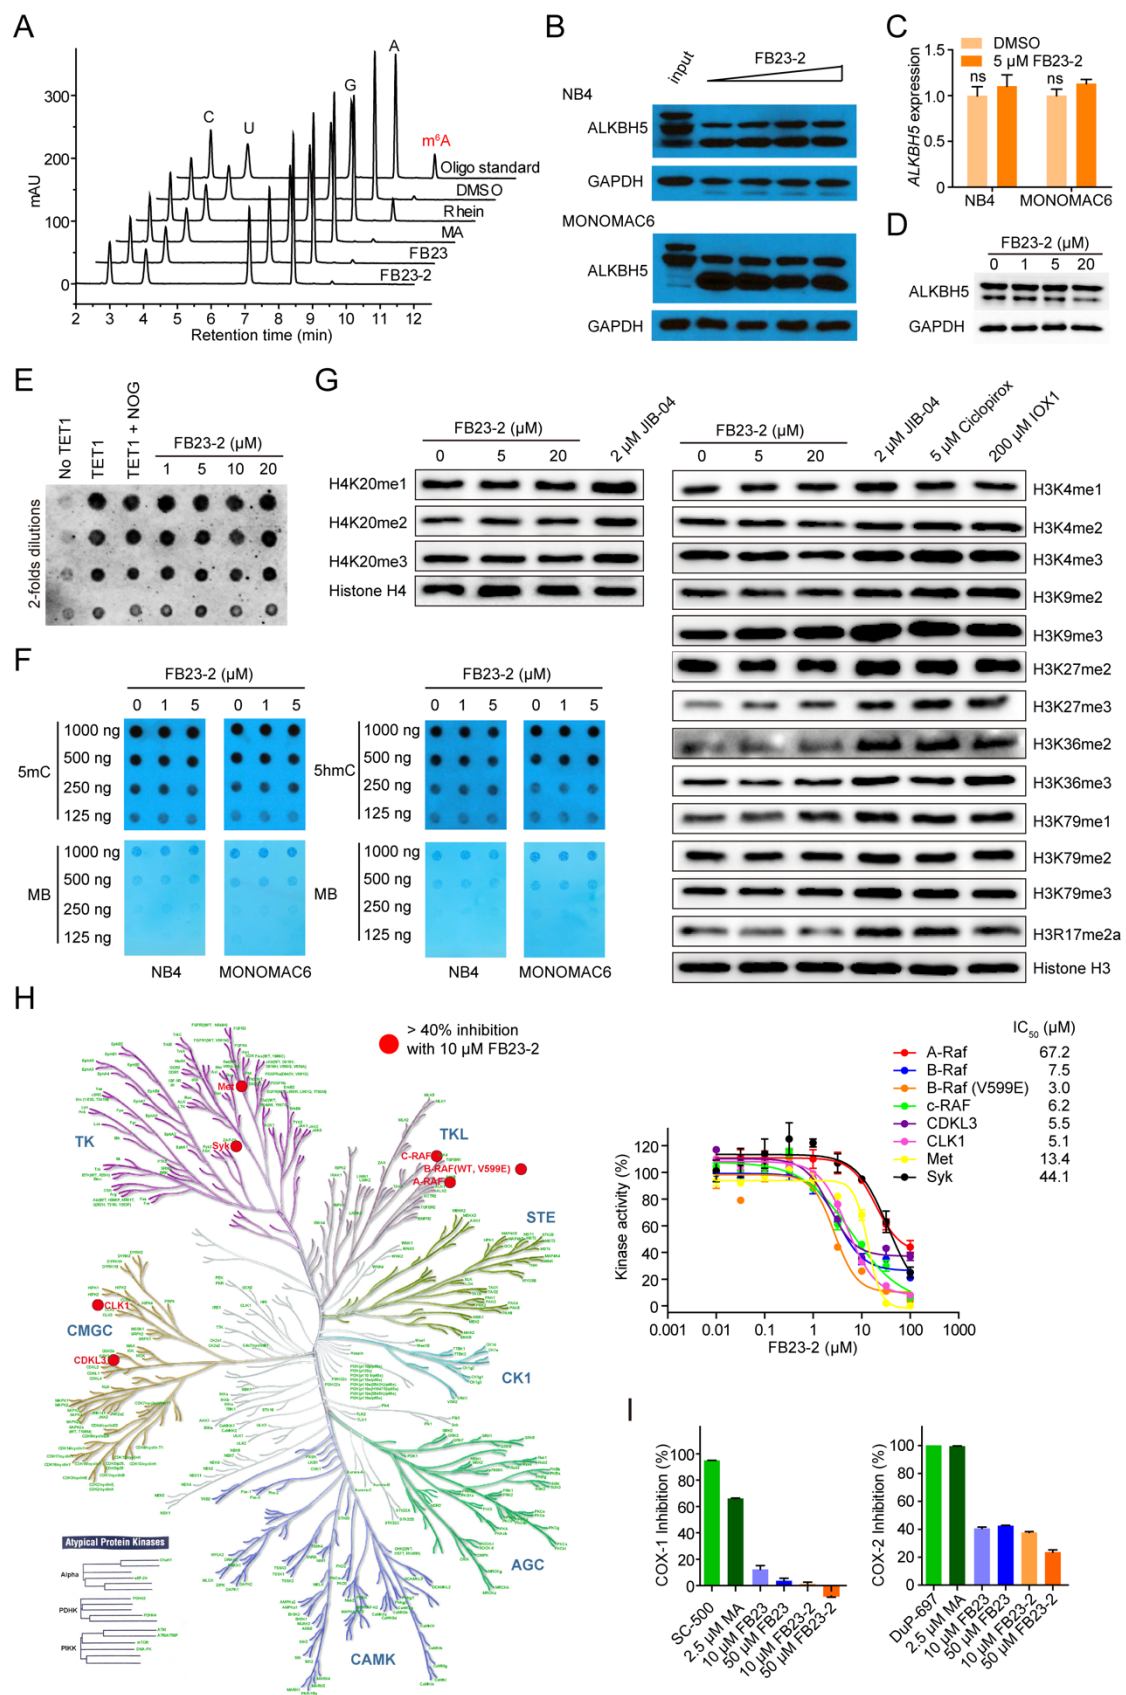

RNA in the absence and presence of inhibitors was detected by HPLC. ALKBH5 is active on m<sup>6</sup>A RNA substrate, which is observed to be inhibited by rhein at 50  $\mu$ M, but not FB23 or FB23-2. (B) Representative DARTS results for ALKBH5 abundance by western blot. 50  $\mu$ M, 200  $\mu$ M and 500  $\mu$ M FB23-2 were incubated with AML cell lysates for 1 hr at room temperature before pronase digestion. The results are derived from two biological replicates. (C) Effects of FB23-2 on *ALKBH5* expression in NB4 and MONOMAC6 AML cells analyzed by RT-qPCR. The cells were treated by DMSO or 5  $\mu$ M FB23-2 for 72 hr. (D) Effects of FB23-2 on ALKBH5 abundance in NB4 AML cells detected by western blot. The cells were treated by DMSO or FB23-2 at indicated concentration for 48 hr. The results are derived from two biological replicates. (E) Effects of FB23-2 on enzymatic activity of TET1 by 5hmC dot blot. (F) Effects of FB23-2 on the abundance of global 5mC and 5hmC on DNA in NB4 and MONOMAC6 AML cells via dot blot assay. The AML cells were treated by DMSO or FB23-2 for 48 hr. MB (Methylene Blue) represents loading control of RNA samples. (G) Effects of FB23-2 on the abundance of histone methylation in NB4 AML cells by western blot. The NB4 AML cells were treated by DMSO or inhibitors as indicated for 48 hr. Representative results are derived from two biological replicates. (H) Selectivity of FB23-2 towards human kinases. The percentage inhibition of 405 human kinases by 10  $\mu$ M FB23-2 was mapped onto the kinome phylogenetic tree. All the screened kinases have the names in green. Kinases inhibited more than 40% have red circles, which were further assayed for the IC<sub>50</sub> calculation. Illustration reproduced courtesy of Cell Signaling Technology, Inc ([www.cellsignal.com](http://www.cellsignal.com)). (I) Selectivity of FB23 and FB23-2 towards COX-1 and COX-2. MA significantly inhibits COX-1 and COX-2 at 2.5  $\mu$ M, while FB23 or FB23-2 minimally inhibits COX-1 and COX-2 even at 50  $\mu$ M. SC-500 and DuP-697 are assayed as positive controls. These experiments were performed in duplicate.

**Table S2. Inhibitions of epigenetic targets by FB23 or FB23-2, Related to Figure 3.**

| Epigenetic targets | Inhibition @ 10 $\mu$ M (%) |                                     | Control    | IC <sub>50</sub> of control |
|--------------------|-----------------------------|-------------------------------------|------------|-----------------------------|
|                    | FB23                        | FB23-2                              |            |                             |
| HDAC1              | 4                           | 13                                  | SAHA       | 8.2 nM                      |
| HDAC9              | 2                           | 5                                   | TMP269     | 49 nM                       |
| SIRT2              | 11                          | 17                                  | Suramin    | 8.6 $\mu$ M                 |
| BRD4(1,2)          | 12                          | 38 (IC <sub>50</sub> > 100 $\mu$ M) | (+)-JQ-1   | 41 nM                       |
| DOT1L              | 15                          | 11                                  | SAH        | 0.84 $\mu$ M                |
| JAR1D1A            | 2                           | 2                                   | 2,4-PDCA   | 0.45 $\mu$ M                |
| JMJD2A             | -1                          | 13                                  | 2,4-PDCA   | 88 nM                       |
| JMJD3              | 5                           | 13                                  | GSK-J1     | 0.14 $\mu$ M                |
| LSD1               | 14                          | 14                                  | RN-1       | 29 nM                       |
| FBXL11             | -6                          | 1                                   | Daminozide | 0.21 $\mu$ M                |

**Table S3. Enzymatic inhibition of proteases by FB23-2, Related to Figure 3.**

| Protease    | Inhibition @ 10 $\mu$ M (%) | Control     | IC <sub>50</sub> of control |
|-------------|-----------------------------|-------------|-----------------------------|
| Caspase 2   | -2                          | Z-VDVAD-FMK | 2.42 $\mu$ M                |
| Caspase 8   | 1                           | Ac-IETD-CHO | 6.87 nM                     |
| Caspase 9   | 6                           | Z-LEHD-FMK  | 0.14 $\mu$ M                |
| Cathepsin D | 0                           | Pepstatin A | 1.26 nM                     |
| Cathepsin F | 11                          | E-64        | 0.031 $\mu$ M               |
| Cathepsin H | 0                           | E-64        | 0.96 $\mu$ M                |
| Cathepsin L | -2                          | Leupeptin   | 4.22 nM                     |
| Cathepsin S | 11                          | E-64        | 1.75 nM                     |
| Cathepsin Z | 12                          | Leupeptin   | 0.38 $\mu$ M                |
| MMP-8       | 5                           | GM-6001     | 0.69 nM                     |
| MMP-14      | -4                          | GM-6001     | 11.7 nM                     |
| TACE        | 6                           | GM-6001     | 0.036 $\mu$ M               |

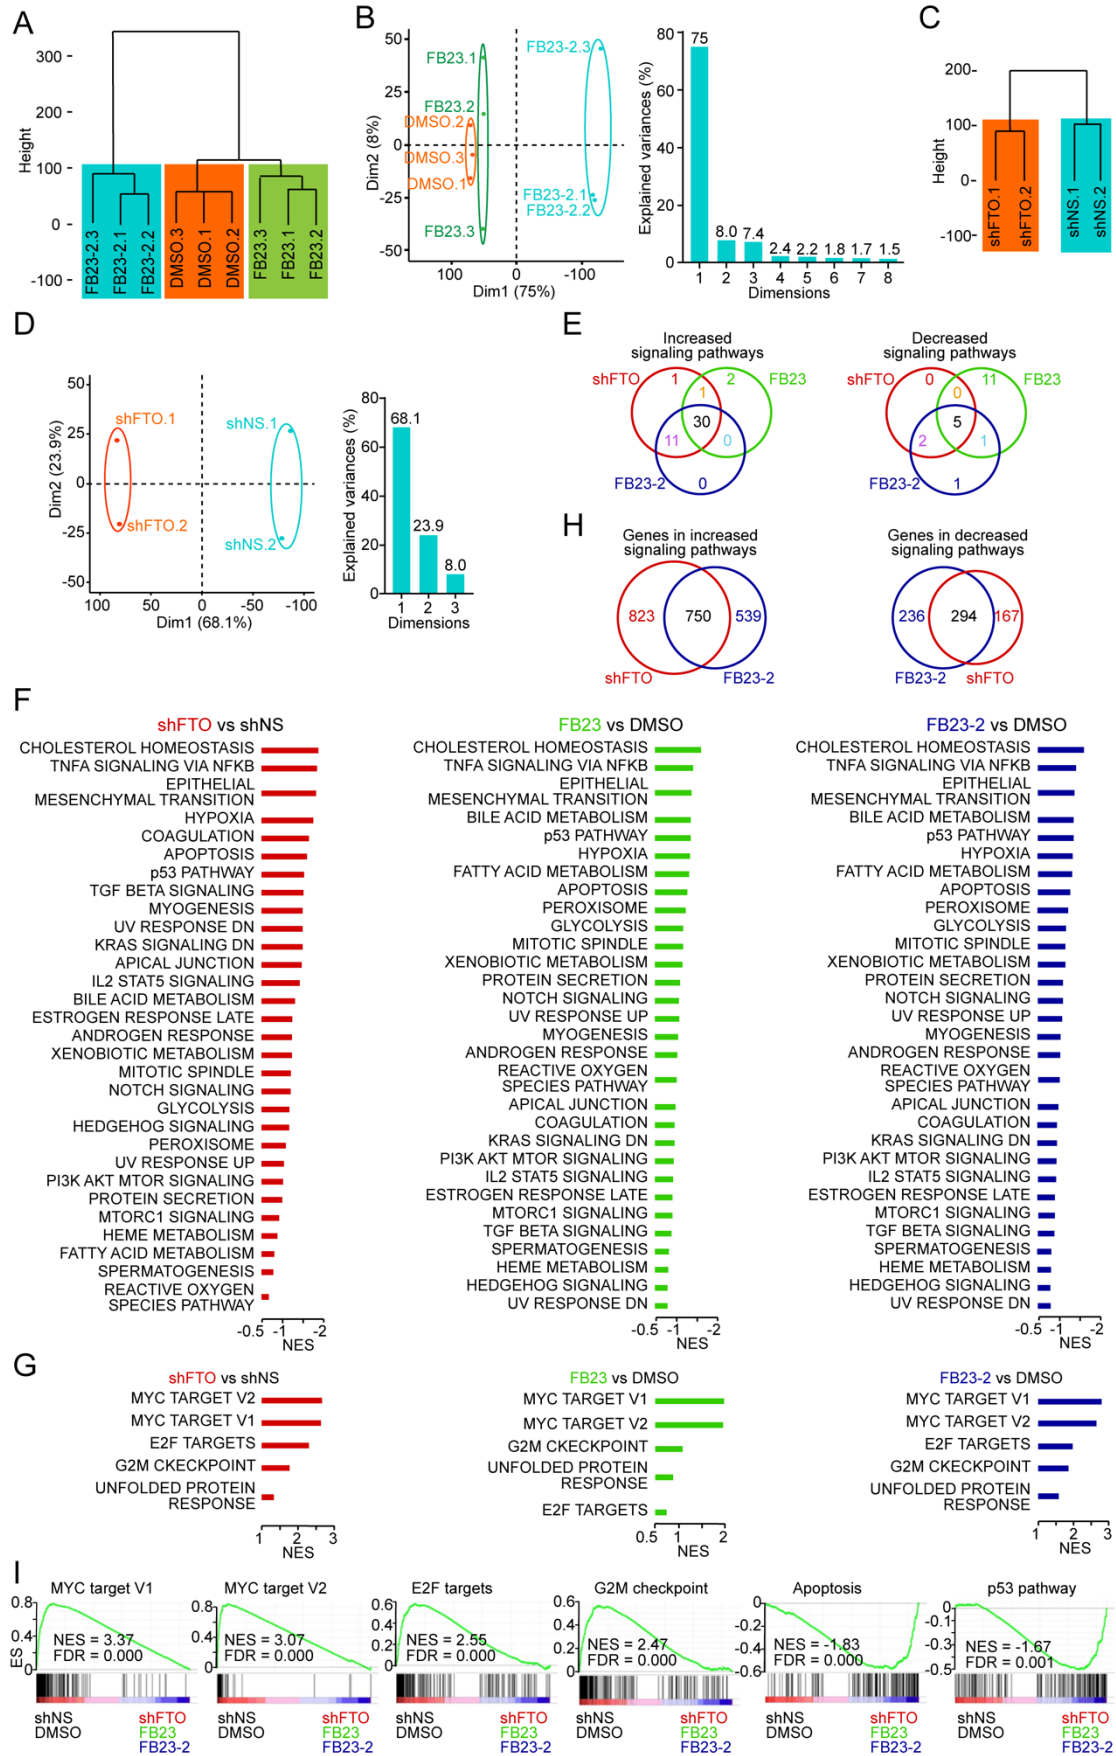

**Figure S3. Transcriptome-wide analysis of RNA-seq assays with *FTO* KD and inhibition in NB4 cells, Related to Figure 5.** (A and B) Hierarchical clustering (A) and PCA (B) on FB23, FB23-2, and DMSO treated groups. The NB4 cells were exposed to DMSO or 5  $\mu$ M inhibitor for 48 hr. (C and D) Hierarchical clustering (C) and PCA (D) on shFTO and shNS treated groups. shNS is the control shRNA. (E) Venn diagram of the changed signaling pathways by *FTO* KD and *FTO* inhibitors induced *FTO* inhibition. (F and G) Detailed information for the 30 co-increased pathways (F) and 5 co-decreased pathways (G) enriched in shFTO vs shNS, FB23 vs DMSO, and FB23-2 vs DMSO groups. Normalized enrichment score (NES) indicated the analysis results across gene sets. (H) Venn diagram of the genes in deregulated signaling pathways shared by *FTO* KD and FB23-2 mediated *FTO* inhibition. (I) GSEA analysis of increased and decreased cell proliferation, cell cycle, and cell apoptosis related pathways between (shFTO + FB23 + FB23-2) vs (shFTO + DMSO). ES represents enrichment score. False discovery rate (FDR) presented if a set was significantly enriched.

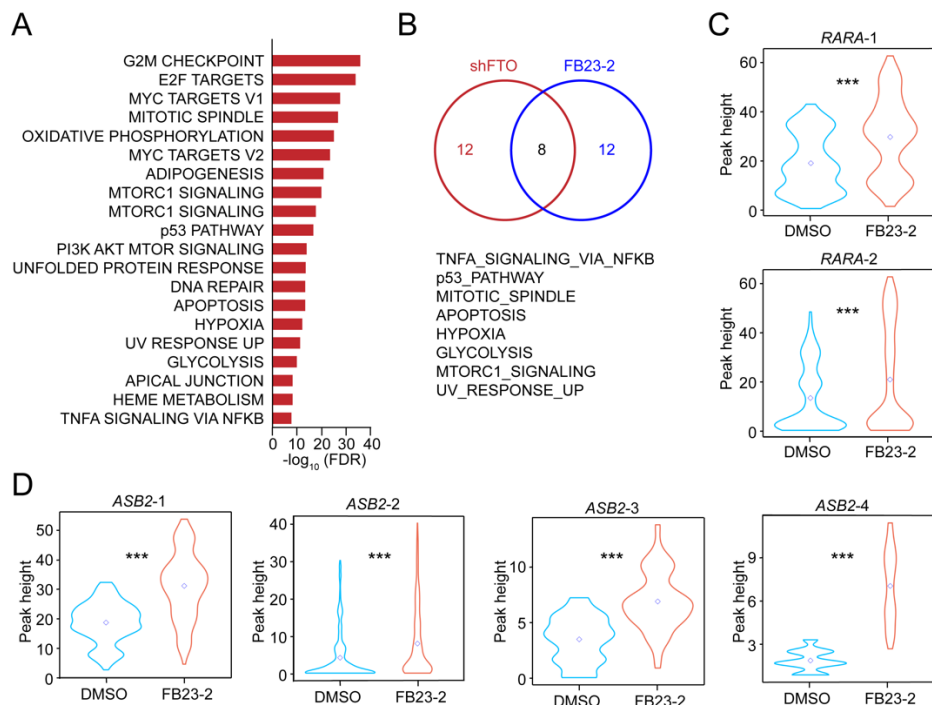

**Figure S4. Analysis of  $m^6A$ -seq assays with *FTO* KD and FB23-2 inhibition in MONOMAC6 cells, Related to Figure 6.** (A) GSEA analysis of the genes with increased  $m^6A$  abundance upon *FTO* KD identified by  $m^6A$ -seq in MONOMAC6 cells. The



MONOMAC6 cells were treated with DMSO or 5  $\mu$ M FB23-2 for 72 hr. (B) Venn diagram of the co-increased and co-decreased signaling pathways by *FTO* KD and FB23-2 induced *FTO* inhibition. Among them, p53 and apoptosis pathways are also enriched. (C and D) The signal densities diagram of the distributions and heights of the m<sup>6</sup>A peaks in *RARA* (C) and *ASB2* (D) identified by m<sup>6</sup>A-seq in MONOMAC6 cells upon DMSO and 5  $\mu$ M FB23-2 treatment for 72 hr. \*\*\*,  $p < 0.001$ .

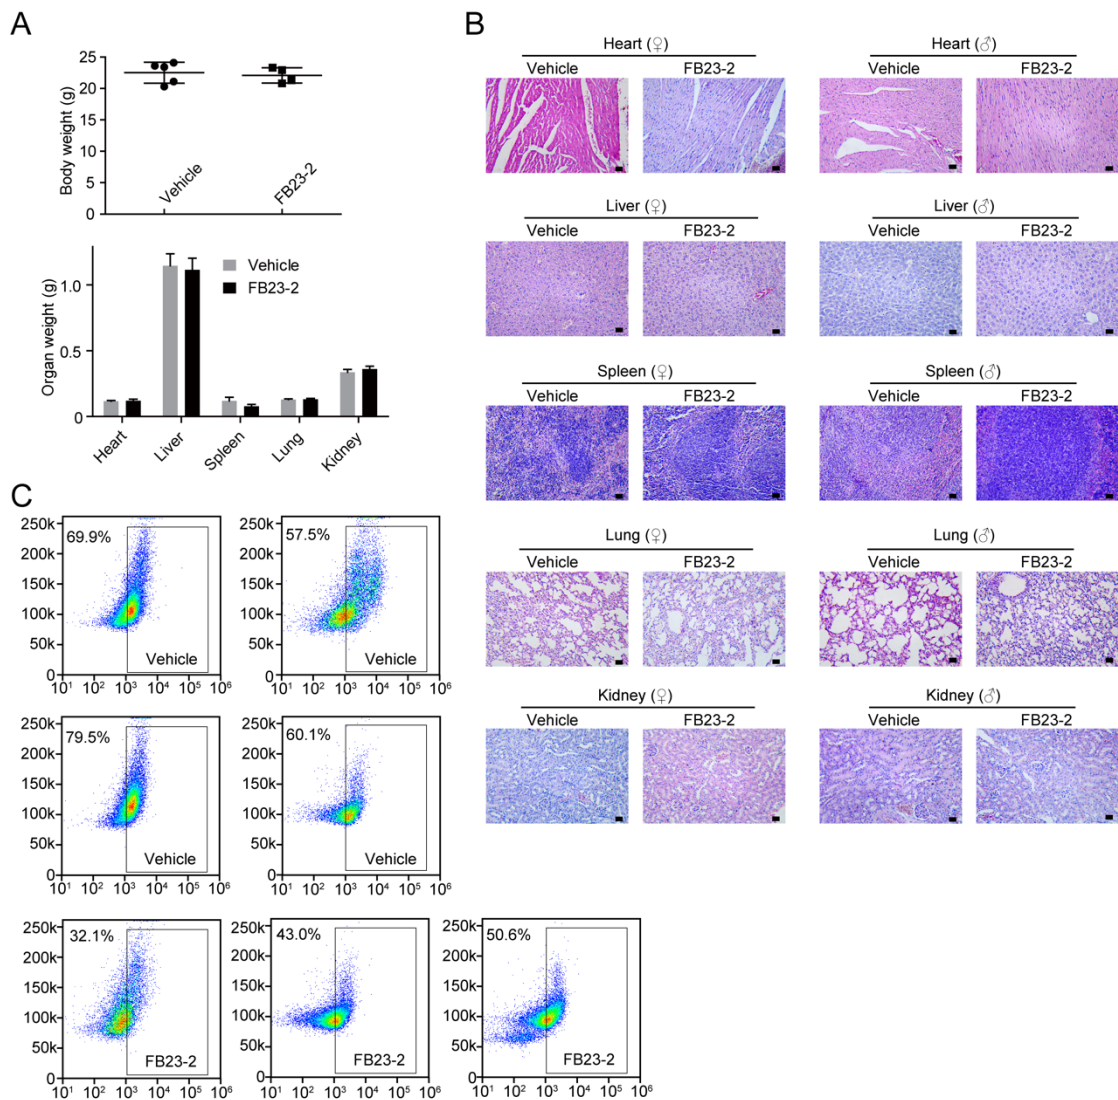

**Figure S5. FB23-2 inhibition of leukemogenesis on mice, Related to Figure 7.** (A) The weight of body and organs of male BALB/c mice at day 15. The mice (n = 5) were treated with vehicle or FB23-2 at a dose of 20 mg/kg daily for 14 days. (B) Histological

morphology of H&E-stained tissue sections of representative mice after treatment of 14 days with vehicle or FB23-2 at a dose of 20 mg/kg daily. Bar, 100  $\mu$ m. (C) Abundance of leukemic cells into NSGS mice. The abundance of human leukemic MONOMAC6 cell into PB of recipient NSGS mice was assessed via staining human CD33. The x-axis represents hCD33-PE, and y-axis represents SSC.

**Table S5. The complete blood content analysis of BALB/c mice (n = 5) treated with FB23-2 for 14 days, Related to Figure 7.**

| Test (unit)                     | Vehicle (♀)<br>(Mean $\pm$ SD) | 20 mg/kg (♀)<br>(Mean $\pm$ SD) | Vehicle (♂)<br>(Mean $\pm$ SD) | 20 mg/kg (♂)<br>(Mean $\pm$ SD) |
|---------------------------------|--------------------------------|---------------------------------|--------------------------------|---------------------------------|
| WBC ( $\times 10^9$ cells/L)    | 2.30 $\pm$ 0.63                | 3.74 $\pm$ 1.26                 | 5.52 $\pm$ 1.44                | 5.94 $\pm$ 1.75                 |
| NEUT ( $\times 10^9$ cells/L)   | 0.79 $\pm$ 0.13                | 1.83 $\pm$ 0.66                 | 2.40 $\pm$ 1.02                | 3.52 $\pm$ 1.26                 |
| LYM ( $\times 10^9$ cells/L)    | 1.39 $\pm$ 0.56                | 1.59 $\pm$ 0.73                 | 2.87 $\pm$ 0.91                | 2.12 $\pm$ 0.52                 |
| MONO ( $\times 10^9$ cells/L)   | 0.05 $\pm$ 0.01                | 0.09 $\pm$ 0.05                 | 0.09 $\pm$ 0.03                | 0.14 $\pm$ 0.08                 |
| EOS ( $\times 10^9$ cells/L)    | 0.07 $\pm$ 0.01                | 0.20 $\pm$ 0.24                 | 0.07 $\pm$ 0.07                | 0.07 $\pm$ 0.08                 |
| BASO ( $\times 10^8$ cells/L)   | 0.05 $\pm$ 0.03                | 0.06 $\pm$ 0.03                 | 0.15 $\pm$ 0.06                | 0.14 $\pm$ 0.07                 |
| RBC ( $\times 10^{12}$ cells/L) | 9.69 $\pm$ 0.27                | 8.94 $\pm$ 0.79                 | 9.92 $\pm$ 0.80                | 8.45 $\pm$ 0.92                 |
| PLT ( $\times 10^9$ cells/L)    | 1201.50 $\pm$ 44.59            | 1288.60 $\pm$ 78.68             | 1461.60 $\pm$ 683.40           | 1449.00 $\pm$ 205.7             |
| RET ( $\times 10^9$ cells/L)    | 487.35 $\pm$ 39.17             | 618.62 $\pm$ 299.82             | 484.44 $\pm$ 221.34            | 549.63 $\pm$ 134.79             |
| MCH (pg)                        | 15.20 $\pm$ 0.14               | 14.96 $\pm$ 0.25                | 15.04 $\pm$ 0.43               | 15.20 $\pm$ 0.22                |
| MCV (fL)                        | 48.25 $\pm$ 1.06               | 47.60 $\pm$ 0.82                | 47.50 $\pm$ 0.68               | 48.63 $\pm$ 1.31                |
| MCHC (g/L)                      | 313.50 $\pm$ 4.20              | 314.20 $\pm$ 4.09               | 316.00 $\pm$ 7.68              | 313.00 $\pm$ 11.6               |
| HGB (g/L)                       | 147.25 $\pm$ 4.11              | 133.60 $\pm$ 11.97              | 149.20 $\pm$ 15.79             | 129.00 $\pm$ 15.64              |
| HCT (%)                         | 46.95 $\pm$ 0.60               | 42.52 $\pm$ 3.83                | 47.16 $\pm$ 4.22               | 41.05 $\pm$ 3.5                 |
| RDW (%)                         | 13.50 $\pm$ 0.80               | 14.20 $\pm$ 1.22                | 14.10 $\pm$ 0.80               | 13.95 $\pm$ 0.45                |

**Table S6. The plasma biochemistry analysis of BALB/c mice (n = 5) treated with FB23-2 for 14 days, Related to Figure 7.**

| Test (unit)   | Vehicle (♀)<br>(Mean ± SD) | 20 mg/kg (♀)<br>(Mean ± SD) | Vehicle (♂)<br>(Mean ± SD) | 20 mg/kg (♂)<br>(Mean ± SD) |
|---------------|----------------------------|-----------------------------|----------------------------|-----------------------------|
| TBIL (µmol/L) | 0.64 ± 0.77                | 1.50 ± 1.57                 | 0.64 ± 0.77                | 0.68 ± 0.78                 |
| TP (g/L)      | 47.60 ± 2.20               | 43.3 ± 2.96                 | 47.60 ± 2.20               | 50.36 ± 5.98                |
| ALB (g/L)     | 26.52 ± 1.00               | 24.15 ± 1.59                | 26.52 ± 1.00               | 30.64 ± 5.47                |
| GLB (g/L)     | 21.08 ± 1.47               | 19.15 ± 1.38                | 21.08 ± 1.47               | 19.72 ± 2.39                |
| A/G           | 2.52 ± 0.18                | 2.60 ± 0.00                 | 2.52 ± 0.18                | 3.12 ± 0.72                 |
| ALT (U/L)     | 40.80 ± 16.89              | 36.67 ± 11.55               | 40.80 ± 16.89              | 56.40 ± 36.56               |
| AST (U/L)     | 137.2 ± 32.3               | 113.33 ± 30.09              | 137.2 ± 32.3               | 176.00 ± 72.94              |
| AST/ALT       | 7.46 ± 2.69                | 5.33 ± 2.19                 | 7.46 ± 2.69                | 7.29 ± 3.03                 |
| ALP (U/L)     | 41.20 ± 20.47              | 23.5 ± 25.16                | 41.20 ± 20.47              | 58.00 ± 22.72               |
| UREA (mmol/L) | 7.05 ± 1.61                | 8.67 ± 0.85                 | 7.05 ± 1.61                | 10.49 ± 1.68                |
| CR (µmol/L)   | 2.00 ± 0.00                | 2.00 ± 0.00                 | 2.00 ± 0.00                | 2.00 ± 0.00                 |
| GLU (mmol/L)  | 2.94 ± 1.14                | 3.48 ± 2.36                 | 2.94 ± 1.14                | 4.48 ± 1.77                 |
| TC (mmol/L)   | 2.63 ± 0.25                | 2.11 ± 0.42                 | 2.63 ± 0.25                | 3.02 ± 0.69                 |
| TG (mmol/L)   | 1.84 ± 0.44                | 1.01 ± 0.27                 | 1.84 ± 0.44                | 1.63 ± 0.40                 |
| CK (U/L)      | 615.20 ± 195.61            | 842.00 ± 658.18             | 615.20 ± 195.61            | 743.60 ± 330.79             |
| K (mmol/L)    | 7.04 ± 0.80                | 29.3 ± 27.13                | 7.04 ± 0.80                | 8.14 ± 2.17                 |
| Na (mmol/L)   | 233.20 ± 4.15              | 230.00 ± 5.89               | 233.20 ± 4.15              | 236.80 ± 1.79               |
| CL (mmol/L)   | 192.60 ± 5.73              | 183.5 ± 10.38               | 192.60 ± 5.73              | 190.60 ± 1.67               |
| Ca (mmol/L)   | 2.16 ± 0.13                | 1.12 ± 1.10                 | 2.16 ± 0.13                | 1.90 ± 0.98                 |
| P (mmol/L)    | 3.09 ± 0.60                | 2.73 ± 0.21                 | 3.09 ± 0.60                | 3.24 ± 0.45                 |

**Table S7. The pharmacokinetics of rat after i.p. administration of 3 mg/kg FB23-2, Related to Figure 7.**

| Analyst | T <sub>max</sub> (hr) | C <sub>max</sub> (ng/ml) | AUC <sub>0-t</sub><br>(hr × ng/ml) | AUC <sub>0-∞</sub><br>(hr × ng/ml) | MRT (hr)  | t <sub>1/2</sub> (hr) |
|---------|-----------------------|--------------------------|------------------------------------|------------------------------------|-----------|-----------------------|
| FB23-2  | 0.08                  | 2421.3 ± 90.9            | 2184 ± 152                         | 2261 ± 145                         | 4.0 ± 0.7 | 6.7 ± 1.3             |
| FB23    | 0.4 ± 0.1             | 142.5 ± 26.1             | 2262 ± 483                         | 3310 ± 721                         | N/A       | N/A                   |

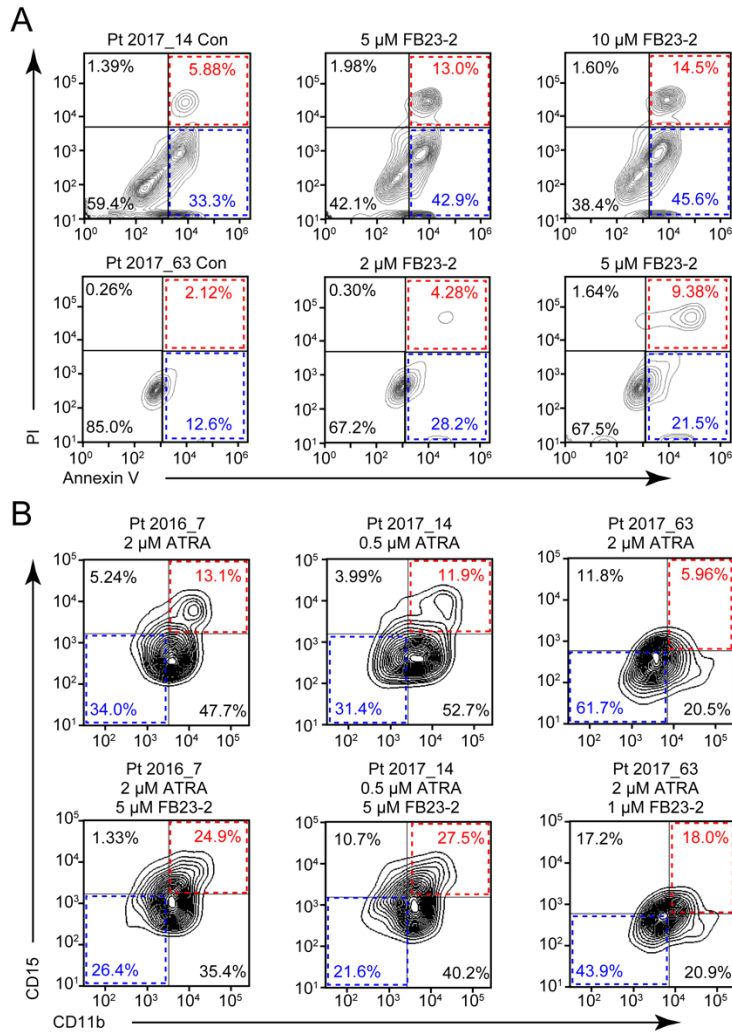

**Figure S6. Effects of FB23-2 treatment on primary AML cells, Related to Figure 8.** Effects of FB23-2 on cell apoptosis (A) and ATRA-induced myeloid differentiation (B) in patient AML cells analyzed by FACS. Cells for apoptosis analysis (A) were treated by DMSO or FB23-2 at indicated concentration for 48 hr, while cells for ATRA-induced myeloid analysis (B) were treated for 96 hr.

**Table S8. Mutation profiles of the four primary patients. X stands for genetic alteration, Related to Figure 8.**

| <b>Genetic Alterations - Gene</b> | <b>Genetic Alterations - AA Alteration</b> | <b>Pt 2016_7</b> | <b>Pt 2017_14</b> | <b>Pt 2017_63</b> | <b>Pt 2014_59</b> |
|-----------------------------------|--------------------------------------------|------------------|-------------------|-------------------|-------------------|
| <i>DNMT3A</i>                     | R882L                                      |                  |                   |                   | X                 |
| <i>FLT3</i>                       | L576_Q577ins17                             |                  |                   |                   | X                 |
| <i>KRAS</i>                       | G13D                                       |                  | X                 |                   |                   |
| <i>MLL</i>                        | <i>MLL3 (AF9)</i> fusion                   | X                |                   |                   |                   |
| <i>MLL</i>                        | <i>MLL-MVB12B</i> fusion                   |                  | X                 |                   |                   |
| <i>MLL</i>                        | <i>MLL-MLL10 (AF10)</i> fusion             |                  | X                 |                   |                   |
| <i>MNX1</i>                       | t(7;12)(q36;p13) <i>MNX1/ETV6</i> fusion   |                  |                   | X                 |                   |
| <i>NPM1</i>                       | W288fs*10+                                 |                  |                   |                   | X                 |
| <i>PTPN11</i>                     | p.D61V c.182A>T                            |                  |                   | X                 |                   |
| <i>PTPN11</i>                     | D61Y                                       |                  |                   |                   | X                 |
| <i>WT1</i>                        | A382fs*11,<br>A382fs*4                     |                  |                   |                   | X                 |
|                                   |                                            |                  |                   |                   |                   |
| <b>VUS Gene</b>                   | <b>VUS Alteration</b>                      | <b>Pt 2016_7</b> | <b>Pt 2017_14</b> | <b>Pt 2017_63</b> | <b>Pt 2014_59</b> |
| <i>ASMTL</i>                      | A417E                                      | X                |                   |                   |                   |
| <i>ARID1A</i>                     | N2220S                                     |                  | X                 |                   |                   |
| <i>ASXL</i>                       | missense                                   |                  |                   | X                 |                   |
| <i>BRCA1</i>                      | F486L                                      |                  | X                 |                   |                   |
| <i>BRCA1</i>                      | N550H                                      |                  | X                 |                   |                   |
| <i>BRCA1</i>                      | Y179C                                      |                  | X                 |                   |                   |
| <i>CIC</i>                        | E83G                                       | X                |                   |                   |                   |
| <i>DNM2</i>                       | V748_S764>G                                | X                |                   |                   |                   |
| <i>EPHB1</i>                      | V562I                                      | X                |                   |                   |                   |
| <i>FBXO11</i>                     | S747G                                      |                  | X                 |                   |                   |
| <i>FGFR1</i>                      | R477K                                      |                  | X                 |                   |                   |
| <i>FLT4</i>                       | V1355M                                     |                  | X                 |                   |                   |
| <i>GATA2</i>                      | P161A                                      |                  | X                 |                   |                   |
| <i>HIST1H1E</i>                   | A47V                                       | X                |                   |                   |                   |
| <i>MAP3K1</i>                     | P257L                                      |                  | X                 |                   |                   |
| <i>MAP3K14</i>                    | G368R                                      | X                |                   |                   |                   |
| <i>MET</i>                        | R143Q                                      |                  |                   |                   | X                 |
| <i>MKI67</i>                      | E2658G                                     | X                |                   |                   |                   |
| <i>MKI67</i>                      | R116C                                      |                  |                   |                   | X                 |
| <i>MLL</i>                        | R3470H                                     |                  | X                 |                   |                   |

|                  |                |   |   |  |   |
|------------------|----------------|---|---|--|---|
| <i>MLL3</i>      | P1863A, P1946L |   |   |  | X |
| <i>MSH2</i>      | N596S          |   | X |  |   |
| <i>MYC</i>       | T73H           |   |   |  | X |
| <i>NOTCH1</i>    | E1148K         | X |   |  |   |
| <i>PIK3CG</i>    | R359H          | X |   |  |   |
| <i>RAD21</i>     | R54L           |   |   |  | X |
| <i>STAT5B</i>    | G721S          |   | X |  |   |
| <i>TCF3</i>      | A203T          |   | X |  |   |
| <i>TLL2</i>      | G629A          | X |   |  |   |
| <i>TNFRSF11A</i> | D427N          | X |   |  |   |
| <i>TNFRSF17</i>  | K160Q          | X |   |  |   |
| <i>YY1AP1</i>    | G79V           |   | X |  |   |

**Table S9. Primers for RT-qPCR, Related to STAR Method.**

| <b>ID</b>          | <b>Sequence</b>               | <b>Source</b>  |
|--------------------|-------------------------------|----------------|
| <i>FTO</i> -Fwd    | 5'-AGAATGTCTGTGACGATGTGG-3'   | Generay, China |
| <i>FTO</i> -Rev    | 5'-GCACTTTCTGTATCGATTGCC-3'   | Generay, China |
| <i>ASB2</i> -Fwd   | 5'-CGTGGTGACGTTCTGTGAGT-3'    | Generay, China |
| <i>ASB2</i> -Rev   | 5'-GTGAGCCAGAGGTCTTGGAG-3'    | Generay, China |
| <i>RARA</i> -Fwd   | 5'-CCAGCTCCAACAGAAGCAG-3'     | Generay, China |
| <i>RARA</i> -Rev   | 5'-AGGCCTCTGTCCAAGGAGTC-3'    | Generay, China |
| <i>GAPDH</i> -Fwd  | 5'-GCCGCATCTTCTTTGCGTC-3'     | Generay, China |
| <i>GAPDH</i> -Rev  | 5'-TGAAGGGGTCATTGATGGCA-3'    | Generay, China |
| <i>ALKBH5</i> -Fwd | 5'-CGGCGAAGGCTACACTTACG-3'    | Generay, China |
| <i>ALKBH5</i> -Rev | 5'-CCACCAGCTTTTGGATCACCA-3'   | Generay, China |
| <i>MYC</i> -Fwd    | 5'-GTCAAGAGGCGAACACACAAC-3'   | Generay, China |
| <i>MYC</i> -Rev    | 5'-TTGGACGGACAGGATGTATGC-3'   | Generay, China |
| <i>CEBPA</i> -Fwd  | 5'-AAGAAGTCGGTGGACAAGAACAG-3' | Generay, China |
| <i>CEBPA</i> -Rev  | 5'-GCGGTCATTGTCACTGGTCA-3'    | Generay, China |
